# Supplementary material
Source: publisher figshare collection journal article supplement (https://sage.figshare.com/ndownloader/files/14530421)
Supplement: Supplementary file 1 [file 14530421]

***Replication Code for "The Mass Political Economy of Capital Controls"

**Figure 4 & Table D1
*APES Dataset
ologit usdcontrol cambiemos fpv pj female education ideology class nojob ccba i.provincia 
margins, predict(outcome(5)) dydx(cambiemos fpv pj female education ideology class nojob ccba)
marginsplot, horiz name(fig4a)
*Isonomia Dataset
ologit usdcontrolr cambiemos fpv pj female education ideology class nojob ccba i.Provincia
margins, predict(outcome(5)) dydx(cambiemos fpv pj female education ideology class nojob ccba)
marginsplot, horiz name(fig4b)
graph combine fig4a fig4b, xcommon

**Figure 5 & Table G1 (APES Dataset)
logit scioli cristina2011 cambiemos fpv pj female education ideology class nojob ccba kincontrol usdcontrol i.provincia 
margins, dydx(cristina2011 cambiemos fpv pj female education ideology class nojob ccba kincontrol usdcontrol)
marginsplot, horiz name(fig5a)
logit sciolird1vote cristina2011 cambiemos fpv pj female education ideology class nojob ccba kincontrol usdcontrol i.provincia 
margins, dydx(cristina2011 cambiemos fpv pj female education ideology class nojob ccba kincontrol usdcontrol)
marginsplot, horiz name(fig5b)
logit sciolird2vote cristina2011 cambiemos fpv pj female education ideology class nojob ccba kincontrol usdcontrol i.provincia 
margins, dydx(cristina2011 cambiemos fpv pj female education ideology class nojob ccba kincontrol usdcontrol)
marginsplot, horiz name(fig5c)
logit sciolird2vote scioli cristina2011 cambiemos fpv pj female education ideology class nojob ccba kincontrol usdcontrol i.provincia 
margins, dydx(scioli cristina2011 cambiemos fpv pj female education ideology class nojob ccba kincontrol usdcontrol)
marginsplot, horiz name(fig5d)
graph combine fig5a fig5b fig5c fig5d, xcommon ycommon


**Appendix D - APES Dataset
reg usdcontrol cambiemos fpv pj female education ideology class nojob ccba i.provincia 
ologit usdcontrol ccba nojob class ideology education female cambiemos fpv pj stateopinion i.provincia 
ologit usdcontrol ccba nojob class ideology education female cambiemos fpv pj  publicsector privsector informalsector owner i.provincia 
ologit usdcontrol ccba nojob class ideology education female cambiemos fpv pj  basicknowledge i.provincia 
ologit usdcontrol ccba nojob class ideology education female cambiemos fpv pj  kincontrol cristina2011 i.provincia 
ologit usdcontrol ccba nojob  ideology education female cambiemos fpv pj  nonfinasset i.provincia 
ologit usdcontrol cambiemos fpv pj female education ideology class nojob financialization i.provincia 
ologit usdcontrol cambiemos fpv pj female education ideology class nojob financialization1 i.provincia 
ologit usdcontrol highknowledge ccba hkccba nojob hknojob class hkclass ideology hkideology education hkeducation female hkfemale pj hkpj fpv hkfpv cambiemos hkcambiemos i.provincia if edad>17

**Appendix D - Isonomia Dataset
reg usdcontrolr cambiemos fpv pj female education ideology class nojob ccba i.Provincia
ologit usdcontrolr ccba nojob class ideology education female cambiemos fpv pj nationalism i.Provincia
ologit usdcontrolr ccba nojob class ideology education female publicsector financesector tradablesector cambiemos fpv pj i.Provincia
ologit usdcontrolr ccba nojob class ideology education female cambiemos fpv pj knowledge i.Provincia
ologit usdcontrolr financialization nojob class ideology education female cambiemos fpv pj i.Provincia
ologit usdcontrolr highknowledge ccba hkccba nojob hknojob class hkclass ideology hkideology education hkeducation female hkfemale pj hkpj fpv hkfpv cambiemos hkcambiemos i.Provincia

**Appendix E - APES Dataset
ologit kincontrol ccba nojob class ideology education female cambiemos fpv pj i.provincia 
ologit auhopinion ccba nojob class ideology education female cambiemos fpv pj i.provincia 
ologit priceregopinion ccba nojob class ideology education female cambiemos fpv pj i.provincia 
ologit importcontrol ccba nojob class ideology education female cambiemos fpv pj i.provincia 

**Appendix E - Isonomia Dataset
ologit kincontrolr ccba nojob class ideology education female cambiemos fpv pj i.Provincia
ologit debtopinion ccba nojob class ideology education female cambiemos fpv pj i.Provincia
ologit cepoknowledge ccba nojob class ideology education female i.partyid3 otherknowledge1 i.Provincia
ologit inflowconknowledge ccba nojob class ideology education female i.partyid3 otherknowledge2 i.Provincia
ologit fditradeknowledge ccba nojob class ideology education female i.partyid3 otherknowledge3 i.Provincia
ologit socpolknowledge ccba nojob class ideology education female i.partyid3 otherknowledge4 i.Provincia
mlogit cepobw ccba nojob class ideology education female i.partyid3 i.Provincia, base(1)

**Appendix G - Table G2 (APES Dataset)
logit scioli cristina2011 cambiemos fpv pj female education ideology class nojob ccba kincontrol usdcontrol stateopinion i.provincia 
logit sciolird1vote cristina2011 cambiemos fpv pj female education ideology class nojob ccba kincontrol usdcontrol stateopinion i.provincia 
logit sciolird2vote cristina2011 cambiemos fpv pj female education ideology class nojob ccba kincontrol usdcontrol stateopinion i.provincia 
logit sciolird2vote scioli cristina2011 cambiemos fpv pj female education ideology class nojob ccba kincontrol usdcontrol stateopinion i.provincia 

**Appendix G - Table G3 (APES Dataset)
logit scioli cristina2011 cambiemos fpv pj female education ideology class nojob ccba kincontrol usdcontrol personaleconsit nationaleconsit i.provincia 
logit sciolird1vote cristina2011 cambiemos fpv pj female education ideology class nojob ccba kincontrol usdcontrol personaleconsit nationaleconsit i.provincia 
logit sciolird2vote cristina2011 cambiemos fpv pj female education ideology class nojob ccba kincontrol usdcontrol personaleconsit nationaleconsit i.provincia 
logit sciolird2vote scioli cristina2011 cambiemos fpv pj female education ideology class nojob ccba kincontrol usdcontrol personaleconsit nationaleconsit i.provincia 

**Appendix G - Table G5 (APES Dataset)
logit scioli cristina2011 cambiemos fpv pj female education ideology nonfinasset nojob ccba kincontrol usdcontrol  i.provincia 
logit sciolird1vote cristina2011 cambiemos fpv pj female education ideology nonfinasset nojob ccba kincontrol usdcontrol  i.provincia 
logit sciolird2vote cristina2011 cambiemos fpv pj female education ideology nonfinasset nojob ccba kincontrol usdcontrol  i.provincia 
logit sciolird2vote scioli cristina2011 cambiemos fpv pj female education ideology nonfinasset nojob ccba kincontrol usdcontrol  i.provincia 

**Appendix G - Tables G5-G6
mlogit voteparty usdcontrol kincontrol ccba nojob class ideology education female cambiemos fpv pj cristina2011 i.provincia, base(0)
mlogit rd1votenom usdcontrol kincontrol ccba nojob class ideology education female cambiemos fpv pj  cristina2011 i.provincia, base(0)
